# Supplementary material for: Long-time charge separation in porphyrin/KTa(Zr)O3 as water splitting photocatalyst
Source: Royal Society of Chemistry journal article supplement (doi:10.1039/c1cp22425e), 2011-01-01
Supplement: c1cp22425e.pdf [file c1cp22425e.pdf]

Supplementary information

Long-Time Charge Separation in Porphyrin/KTa(Zr)O<sub>3</sub>  
as Water Splitting Photocatalyst

*Hidehisa Hagiwara,<sup>1,2\*</sup> Takanori Inoue,<sup>3</sup> Shintaro Ida,<sup>1,2</sup> and Tatsumi Ishihara<sup>1,2</sup>*

<sup>1</sup>Department of Applied Chemistry, Kyushu University  
744 Motoooka, Nishi-ku, Fukuoka 8190395 (Japan)  
Fax: (+81) 92-802-2871, E-mail: h.hagiwara@cstf.kyushu-u.ac.jp

<sup>2</sup>International Institute for Carbon-Neutral Energy Research (I<sup>2</sup>CNER)  
744 Motoooka, Nishi-ku, Fukuoka 8190395 (Japan)

<sup>3</sup>Department of Applied Chemistry, Oita University  
Dannoharu 700, Oita 8701192 (Japan)

S1

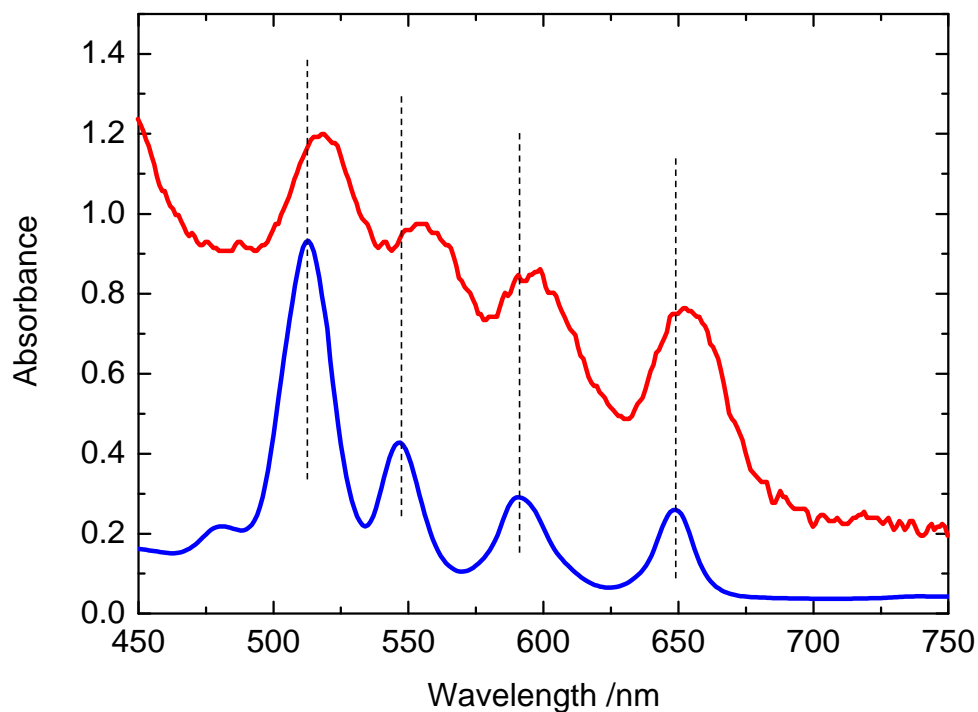

*Figure S1.* UV-vis spectra of Cr-TPP in tetrahydrofuran (THF) (blue line) and on KTa(Zr)O<sub>3</sub> surface (red line). Compared with the absorption spectrum of Cr-TPP monomer in THF, Q-band peaks (500–700 nm) of Cr-TPP/KTa(Zr)O<sub>3</sub> shifts to the long-wavelength side with an 8-10 nm. Red shift of absorption spectrum suggests the formation of Cr-TPP J-like aggregate over KTa(Zr)O<sub>3</sub>.

S2

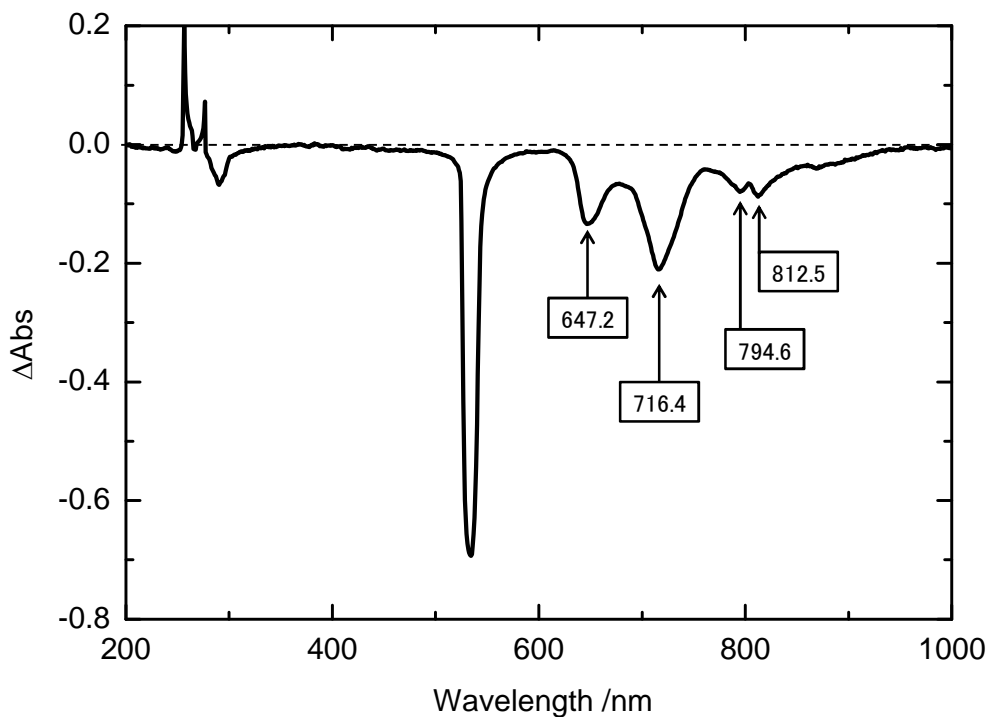

*Figure S2.* Differential UV-vis spectra of Cr-TPP/KTa(Zr)O<sub>3</sub> disk irradiated with/without the fourth harmonic (266 nm) of Nd:YAG laser. 150 W Xe lamp was used for the probe light, and irradiation laser light was controlled by using optical shutter. Differential spectrum was detected with a photonic multichannel analyzer. Peaks of differential spectrum were observed at 647, 716, 795 and 813 nm by photoexcitation of KTa(Zr)O<sub>3</sub>. Along with the differential spectrum, the second harmonic of Nd:YAG laser was detected at 532 nm.

S3

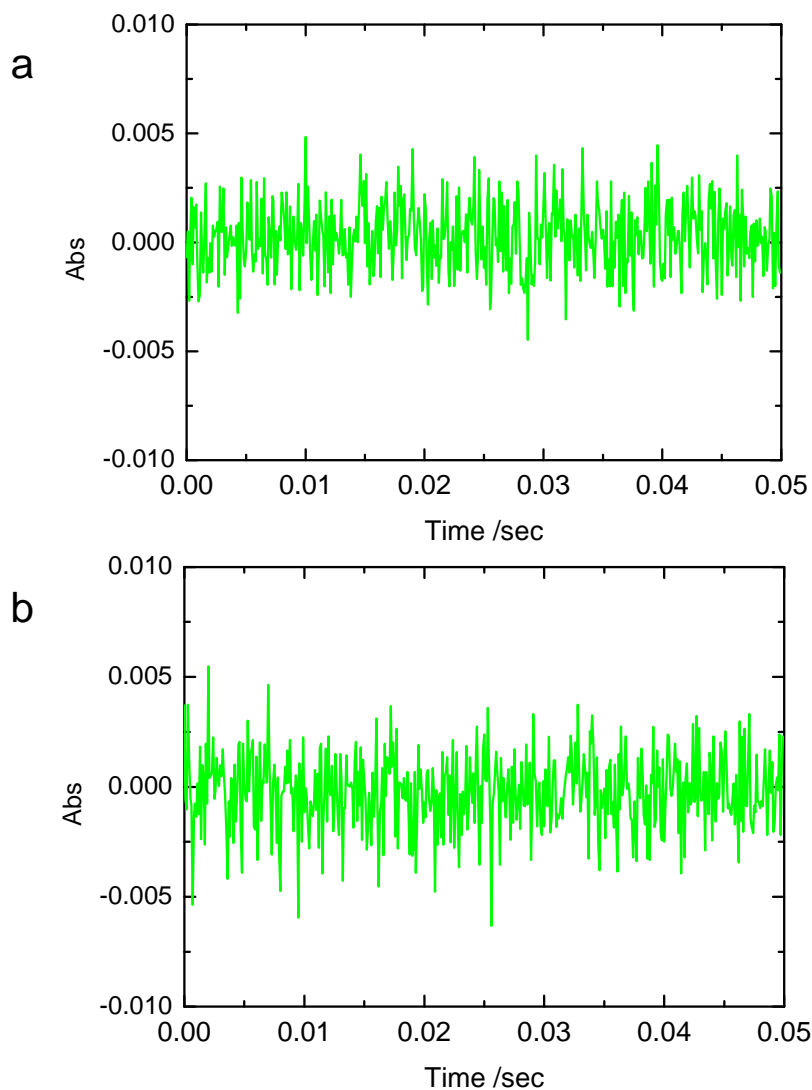

*Figure S3.* Transient absorption decays of Cr-TPP/SiO<sub>2</sub> (b) and PtO<sub>x</sub>/Cr-TPP/SiO<sub>2</sub> observed at 650 nm. Measurements were carried out using the fourth beam (266 nm) from the Nd<sup>3+</sup>:YAG laser as the pump light source, operated by temporal control using a delay generator (DG535, Stanford Research Systems, Inc.). A screw cap quartz cell was used as the sample holder. The probe light from a 150 W Xe lamp (L11033, Hamamatsu Photonics K.K.) was collected with a focusing lens and detected with a photonic multichannel analyzer (PMA-12 C10029, Hamamatsu photonics K.K.). All experiments were performed at room temperature.

S4

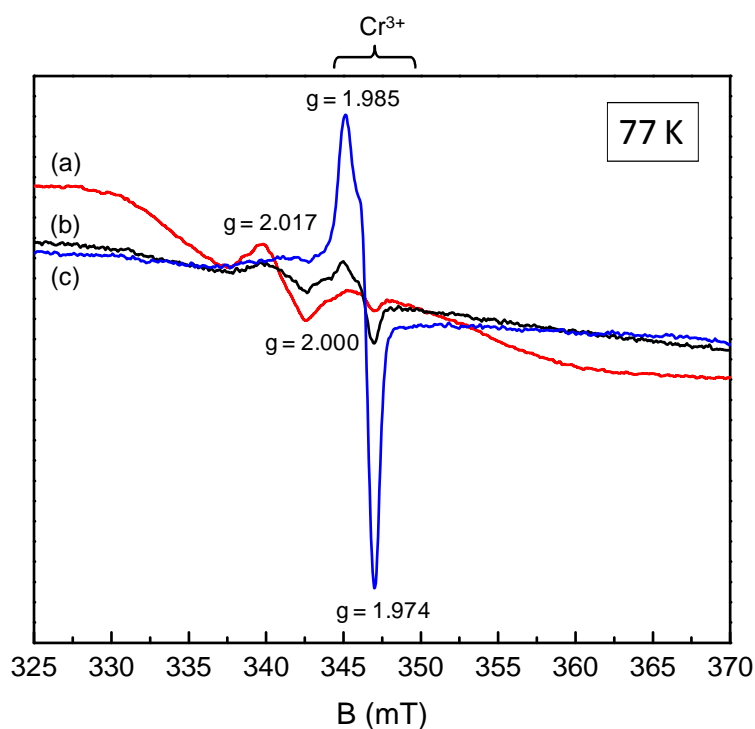

Figure S4. ESR spectra of (a) -1.2 V applied, (b) none, and (c) +1.5 V applied Cr-TPP in frozen *N,N*-dimethylformamide (DMF) at 77 K. Positive or negative voltage was applied using a potentiostat/galvanostat (HSV-100, Hokuto Denko Corp.) with a three-electrode configuration consisting of a Pt wire working electrode ( $\varphi = 0.3$  mm), a Pt wire counter electrode, and a commercially available Ag/AgCl electrode as the reference electrode. Porphyrin dyes were dissolved in DMF containing 0.1 M tetrabutylammonium perchlorate (Strem Chemicals, Inc.) as the supporting electrolyte. Sample solutions were presaturated with  $\text{N}_2$  and the voltage was applied under a  $\text{N}_2$  atmosphere. ESR spectra were measured in a quartz Dewar vessel filled with liquid nitrogen. As shown in Figure S-1, the electrochemical oxidation of Cr-TPP gave increase of the intensity of ESR signal at  $g = 1.985$  and  $g = 1.974$ . This  $g$ -value is well corresponding to  $g$ -value described in the literature edited by A. Abragam and B. Bleaney.<sup>1)</sup> Therefore, we assigned the observed ESR signal to the trivalent state of chromium ( $\text{Cr}^{3+}$ ).

#### Reference

1) A. Abragam and B. Bleaney, "Electron Paramagnetic Resonance of Transition Ions", Clarendon Press, Oxford (1970).
